# Supplementary material for: The dose-response relationship between socioeconomic deprivation and alcohol-attributable mortality risk—a systematic review and meta-analysis
Source: BMC Med. 2021 Nov 5;19:268. doi: 10.1186/s12916-021-02132-z (PMC8569998; doi:10.1186/s12916-021-02132-z)
Supplement: Supplementary file 1 — Additional file 1: The dose-response relationship between socioeconomic deprivation and alcohol-attributable mortality risk – a systematic review and meta-analysis includes Tables S1 to S10, Text S1, and Fig. S1. Table S1 PRISMA 2009 checklist. Text S1. Search terms. Table S2. Inclusion criteria. Table S3. Diagnoses 100% attributable to alcohol use with ICD-10 codes. Table S4. Diagnoses with an alcohol-attributable fraction > 10% for mortality globally as per the Global Status Report on Alcohol and Health, 2018 (100% attributable causes are excluded from this table and shown in Table S3). Table S5 Quality assessment criteria and ratings. Table S6. Quality checklist. Ratings on population representativeness of the sample, measurement of socioeconomic status (SES), operationalization of alcohol-attributable mortality, data linkage, and age-adjustment for each study included in the meta-analysis. Table S7. Results from random-effects meta-regression models predicting the relative risk (RR). Table S8. Results from permutation tests to test the robustness of random-effects meta-regression models predicting the log relative risk (RR) conditional on the level of socioeconomic deprivation, the indicator of socioeconomic status (SES) used, and sex in three consecutive models, while controlling for clustering of estimates within studies. Table S9. Results from one-stage random-effects dose-response meta-analyses on the relative mortality risk for alcohol-attributable mortality conditional on the level of socioeconomic deprivation, stratified by sex and indicator of socioeconomic status (SES). Fig. S1. Dose-response relationship between the level of socioeconomic deprivation and the relative risk of mortality from an alcohol-attributable cause of death (RR) by indicator of socioeconomic status (SES) and sex. Table S10. Results from sensitivity analyses. Random-effects meta-regression models predicting the log relative risk (RR) conditional on the study quality (a least one cri [file 12916_2021_2132_MOESM1_ESM.pdf]

**Additional file 1 for**

**The dose-response relationship between socioeconomic deprivation and alcohol-attributable mortality risk – a systematic review and meta-analysis**

Charlotte Probst, Shannon Lange, Carolin Kilian, Celine Saul, & Jürgen Rehm

**Correspondence to:** Charlotte Probst; Email: [mariecharlotte.probst@gmail.com](mailto:mariecharlotte.probst@gmail.com)

**This PDF file includes:**

Tables S1 to S10

Text S1

Fig. S1

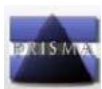

# PRISMA 2009 Checklist

**Table S1** PRISMA 2009 checklist

| Section/topic                      | #  | Checklist item                                                                                                                                                                                                                                                                                              | Reported on page #                                 |
|------------------------------------|----|-------------------------------------------------------------------------------------------------------------------------------------------------------------------------------------------------------------------------------------------------------------------------------------------------------------|----------------------------------------------------|
| <b>TITLE</b>                       |    |                                                                                                                                                                                                                                                                                                             |                                                    |
| Title                              | 1  | Identify the report as a systematic review, meta-analysis, or both.                                                                                                                                                                                                                                         | Title page                                         |
| <b>ABSTRACT</b>                    |    |                                                                                                                                                                                                                                                                                                             |                                                    |
| Structured summary                 | 2  | Provide a structured summary including, as applicable: background; objectives; data sources; study eligibility criteria, participants, and interventions; study appraisal and synthesis methods; results; limitations; conclusions and implications of key findings; systematic review registration number. | 2                                                  |
| <b>INTRODUCTION</b>                |    |                                                                                                                                                                                                                                                                                                             |                                                    |
| Rationale                          | 3  | Describe the rationale for the review in the context of what is already known.                                                                                                                                                                                                                              | 4-5                                                |
| Objectives                         | 4  | Provide an explicit statement of questions being addressed with reference to participants, interventions, comparisons, outcomes, and study design (PICOS).                                                                                                                                                  | 5-6                                                |
| <b>METHODS</b>                     |    |                                                                                                                                                                                                                                                                                                             |                                                    |
| Protocol and registration          | 5  | Indicate if a review protocol exists, if and where it can be accessed (e.g., Web address), and, if available, provide registration information including registration number.                                                                                                                               | 6                                                  |
| Eligibility criteria               | 6  | Specify study characteristics (e.g., PICOS, length of follow-up) and report characteristics (e.g., years considered, language, publication status) used as criteria for eligibility, giving rationale.                                                                                                      | 6, Table S2                                        |
| Information sources                | 7  | Describe all information sources (e.g., databases with dates of coverage, contact with study authors to identify additional studies) in the search and date last searched.                                                                                                                                  | 6                                                  |
| Search                             | 8  | Present full electronic search strategy for at least one database, including any limits used, such that it could be repeated.                                                                                                                                                                               | 6, see PROSPERO protocol for complete search terms |
| Study selection                    | 9  | State the process for selecting studies (i.e., screening, eligibility, included in systematic review, and, if applicable, included in the meta-analysis).                                                                                                                                                   | 6                                                  |
| Data collection process            | 10 | Describe method of data extraction from reports (e.g., piloted forms, independently, in duplicate) and any processes for obtaining and confirming data from investigators.                                                                                                                                  | 6                                                  |
| Data items                         | 11 | List and define all variables for which data were sought (e.g., PICOS, funding sources) and any assumptions and simplifications made.                                                                                                                                                                       | 7                                                  |
| Risk of bias in individual studies | 12 | Describe methods used for assessing risk of bias of individual studies (including specification of whether this was done at the study or outcome level), and how this information is to be used in any data synthesis.                                                                                      | 7, Table S3                                        |

| Section/topic                 | #  | Checklist item                                                                                                                                                                                           | Reported on page #       |
|-------------------------------|----|----------------------------------------------------------------------------------------------------------------------------------------------------------------------------------------------------------|--------------------------|
| Summary measures              | 13 | State the principal summary measures (e.g., risk ratio, difference in means).                                                                                                                            | 7-8                      |
| Risk of bias across studies   | 15 | Specify any assessment of risk of bias that may affect the cumulative evidence (e.g., publication bias, selective reporting within studies).                                                             | 6                        |
| Synthesis of results          | 14 | Describe the methods of handling data and combining results of studies, if done, including measures of consistency (e.g., $I^2$ ) for each meta-analysis.                                                | 7                        |
| Additional analyses           | 16 | Describe methods of additional analyses (e.g., sensitivity or subgroup analyses, meta-regression), if done, indicating which were pre-specified.                                                         | 8                        |
| <b>RESULTS</b>                |    |                                                                                                                                                                                                          |                          |
| Study selection               | 17 | Give numbers of studies screened, assessed for eligibility, and included in the review, with reasons for exclusions at each stage, ideally with a flow diagram.                                          | 10-11 Fig. 1             |
| Study characteristics         | 18 | For each study, present characteristics for which data were extracted (e.g., study size, PICOS, follow-up period) and provide the citations.                                                             | Table 1                  |
| Risk of bias within studies   | 19 | Present data on risk of bias of each study and, if available, any outcome level assessment (see item 12).                                                                                                | Table S3, 6-7            |
| Results of individual studies | 20 | For all outcomes considered (benefits or harms), present, for each study: (a) simple summary data for each intervention group (b) effect estimates and confidence intervals, ideally with a forest plot. | Table 1 as applicable    |
| Synthesis of results          | 21 | Present results of each meta-analysis done, including confidence intervals and measures of consistency.                                                                                                  | 11-13, Table 2, 3        |
| Risk of bias across studies   | 22 | Present results of any assessment of risk of bias across studies (see Item 15).                                                                                                                          | Table S4, 7              |
| Additional analysis           | 23 | Give results of additional analyses, if done (e.g., sensitivity or subgroup analyses, meta-regression [see Item 16]).                                                                                    | Table S5, 14; Fig. S1, 2 |
| <b>DISCUSSION</b>             |    |                                                                                                                                                                                                          |                          |
| Summary of evidence           | 24 | Summarize the main findings including the strength of evidence for each main outcome; consider their relevance to key groups (e.g., healthcare providers, users, and policy makers).                     | 14-15                    |
| Limitations                   | 25 | Discuss limitations at study and outcome level (e.g., risk of bias), and at review-level (e.g., incomplete retrieval of identified research, reporting bias).                                            | 16-17                    |

| Section/topic  | #  | Checklist item                                                                                                                             | Reported on page # |
|----------------|----|--------------------------------------------------------------------------------------------------------------------------------------------|--------------------|
| Conclusions    | 26 | Provide a general interpretation of the results in the context of other evidence, and implications for future research.                    | 17-18              |
| <b>FUNDING</b> |    |                                                                                                                                            |                    |
| Funding        | 27 | Describe sources of funding for the systematic review and other support (e.g., supply of data); role of funders for the systematic review. | 19                 |

*From:* Moher D, Liberati A, Tetzlaff J, Altman DG, The PRISMA Group (2009). Preferred Reporting Items for Systematic Reviews and Meta-Analyses: The PRISMA Statement. PLoS Med 6(7): e1000097. doi:10.1371/journal.pmed1000097

**For more information, visit:** [www.prisma-statement.org](http://www.prisma-statement.org).

## **Text S1 Search terms**

### **Databases**

Systematic literature searches was performed in Embase, Medline and Psychinfo (via OvidSP) as well as Web of Science. The searches will include a set of keywords, wildcards, truncation and medical subject headings (where applicable). The search terms are shown below.

### **OvidSP**

(alcohol \*abuse/ OR (alcohol abuse).ti,ab. OR exp \*Drinking Behavior/ OR exp \*Alcohol Drinking/ OR exp \*Drinking/ OR \*Binge Drinking/ OR (alcoholic beverages).ti,ab. OR (alcohol and (drinking or intake or consumption)).ti,ab.)

AND

(exp \*socioeconomic factors/ OR exp \*social class/ OR socio?economic status.ti,ab. OR Educational status/ OR income/ OR Employment/ OR (education\* ADJ (level OR attain\*)).ti,ab. OR (socio?economic OR SES OR SEP OR asset? score OR income).ti,ab.)

AND

(exp Mortality/ OR exp Mortality, Premature/ OR exp \*excess mortality/ OR \*differential mortality/ OR (mortality).ti,ab. OR \*cause of death/)

AND

(exp Case?Control Studies/ OR exp Cohort studies/ OR (case OR cohort OR control group\* OR ratio OR risk\* OR prospective\* OR follow\* OR longitudinal OR retrospective OR effect modifi\*).ti,ab.)

Limit 1 to yr="2013-Current"

### **Web of Science**

TS=(alcoholic beverages OR alcohol AND (drinking OR intake OR consumption)) OR TS=(Alcohol abuse)

AND

TS=(mortality OR death\* OR cause of death)

AND

TS=(ses OR socioe\$conomic status OR social class OR socio\$economic variable\* OR (education\* AND (attain\* OR status OR level )) OR income OR employment)

AND

TS=(case?control stud\* OR cohort?stud\* OR ratio OR risk\* OR prospective\* OR follow\* OR longitudinal OR retrospective OR effect modifi\*)

**Table S2** Inclusion criteria

| <b>Criterion</b> | <b>Inclusion</b>                                                                                                                                                                                                                                                                             | <b>Exclusion</b>                                                                                                |
|------------------|----------------------------------------------------------------------------------------------------------------------------------------------------------------------------------------------------------------------------------------------------------------------------------------------|-----------------------------------------------------------------------------------------------------------------|
| Outcome          | The outcome is mortality measured at the individual level                                                                                                                                                                                                                                    | Indirectly affected people are investigated (e.g., sober victims of car drivers under the influence of alcohol) |
|                  | The outcome is attributable to alcohol use                                                                                                                                                                                                                                                   |                                                                                                                 |
| SES              | SES is measured via occupation, income, or education                                                                                                                                                                                                                                         | SES is measured on only one level (i.e., no comparison group)                                                   |
|                  | SES is measured at the individual, parental, or household level                                                                                                                                                                                                                              | SES is measured on the neighborhood-level                                                                       |
| Design           | The study is empirical and quantitative                                                                                                                                                                                                                                                      | The study is an intervention study                                                                              |
|                  | The study employed a longitudinal design with data-linkage, a cross-sectional design (deaths with a population denominator), or a case-control design                                                                                                                                        | Intervention studies                                                                                            |
| Sample           | The sample is population-based                                                                                                                                                                                                                                                               | A clinical sample is investigated                                                                               |
|                  | Participants are at least 15 years of age                                                                                                                                                                                                                                                    |                                                                                                                 |
| Results          | The outcome (including N) is reported by SES of the deceased                                                                                                                                                                                                                                 |                                                                                                                 |
|                  | One point estimate measure of relative risk (RR, odds ratio (OR), hazard ratio (HR), standardized mortality ratio (SMR), etc.) comparing risk in different SES strata and its confidence interval, standard error, or sufficient raw data for calculation (N total and n cases) are reported |                                                                                                                 |
| Language         | No restrictions                                                                                                                                                                                                                                                                              |                                                                                                                 |
| Time             | Studies published since February 2013                                                                                                                                                                                                                                                        |                                                                                                                 |

SES socioeconomic status.

**Table S3** Diagnoses 100% attributable to alcohol use with ICD-10 codes

| <b>Diagnosis</b>                                                  | <b>ICD-10 code</b> |
|-------------------------------------------------------------------|--------------------|
| Alcohol-induced pseudo-Cushing's syndrome                         | E24.4              |
| Mental and behavioural disorders due to use of alcohol            | F10                |
| Acute intoxication                                                | F10.0              |
| Harmful use                                                       | F10.1              |
| Dependence syndrome                                               | F10.2              |
| Withdrawal state                                                  | F10.3              |
| Withdrawal state with delirium                                    | F10.4              |
| Psychotic disorder                                                | F10.5              |
| Amnesic syndrome                                                  | F10.6              |
| Residual and late-onset psychotic disorder                        | F10.7              |
| Other mental and behavioural disorders                            | F10.8              |
| Unspecified mental and behavioural disorder                       | F10.9              |
| Degeneration of nervous system due to alcohol                     | G31.2              |
| Alcoholic polyneuropathy                                          | G62.1              |
| Alcoholic myopathy                                                | G72.1              |
| Alcoholic cardiomyopathy                                          | I42.6              |
| Alcoholic gastritis                                               | K29.2              |
| Alcoholic liver disease                                           | K70                |
| Alcoholic fatty liver                                             | K70.0              |
| Alcoholic hepatitis                                               | K70.1              |
| Alcoholic fibrosis and sclerosis of liver                         | K70.2              |
| Alcoholic cirrhosis of liver                                      | K70.3              |
| Alcoholic hepatic failure                                         | K70.4              |
| Alcoholic liver disease, unspecified                              | K70.9              |
| Alcohol-induced pancreatitis                                      | K85.2              |
| Alcohol-induced chronic pancreatitis                              | K86.0              |
| Finding of alcohol in blood                                       | R78.0              |
| Toxic effect of alcohol                                           | T51                |
| Toxic effect of ethanol                                           | T51.0              |
| Toxic effect of methanol                                          | T51.1              |
| Toxic effect of other alcohols                                    | T51.8              |
| Toxic effect of alcohol, unspecified                              | T51.9              |
| Accidental poisoning by and exposure to alcohol                   | X45                |
| Intentional self-poisoning by and exposure to alcohol             | X65                |
| Poisoning by and exposure to alcohol, undetermined intent         | Y15                |
| Evidence of alcohol involvement determined by blood alcohol level | Y90                |

**Table S4** Diagnoses with an alcohol-attributable fraction >10% for mortality globally as per the Global Status Report on Alcohol and Health, 2018 (100% attributable causes are excluded from this table and shown in Table S3) [16]

| Category                 | Sub-category                            | Cause of death                | ICD-10 code                                                          | AAF |
|--------------------------|-----------------------------------------|-------------------------------|----------------------------------------------------------------------|-----|
| Communicable diseases    | Respiratory infections and tuberculosis | Tuberculosis                  | A15-A19, B90                                                         | 20% |
| Injuries                 | Intentional injuries                    | Self-harm                     | X60-64, X66-X69, X65, X70-X84                                        | 18% |
|                          |                                         | Interpersonal violence        | X85-Y09, Y871                                                        | 18% |
|                          | Unintentional injuries                  | Road injury                   | V01-V04, V06, V09-V80, V87, V89, V99                                 | 27% |
|                          |                                         | Poisonings                    | X40, X43, X46-X48, X49                                               | 12% |
|                          |                                         | Falls                         | W00-W19                                                              | 11% |
|                          |                                         | Drowning                      | W65-W74                                                              | 12% |
|                          |                                         | Exposure to mechanical forces | W20-W38, W40-W43, W45, W46, W49-W52, W75, W76                        | 14% |
|                          |                                         | Other unintentional injuries  | V2*, W39, W44, W53-W64, W77-W99, X20-X29, X50-X59, Y40-Y86, Y88, Y89 | 14% |
|                          | Digestive diseases                      | Cirrhosis of the liver        | K70, K74                                                             | 48% |
|                          |                                         | Pancreatitis                  | K85-K86                                                              | 26% |
| Noncommunicable diseases | Malignant neoplasms                     | Lip and oral cavity           | C00-C08                                                              | 26% |
|                          |                                         | Other pharyngeal cancers      | C09-C10, C12-C14                                                     | 31% |
|                          |                                         | Oesophagus cancer             | C15                                                                  | 17% |
|                          |                                         | Colon and rectum cancers      | C18-C21                                                              | 11% |
|                          |                                         | Larynx cancer                 | C32                                                                  | 22% |
|                          | Neurological disorders                  | Epilepsy                      | G40-G41                                                              | 13% |

\* V-series not included in road injuries  
AAF alcohol-attributable fraction.

**Table S5** Quality assessment criteria and ratings

| <b>Criterion</b>                             | <b>Categories</b>                                          | <b>Evaluation</b> | <b>Code</b> |
|----------------------------------------------|------------------------------------------------------------|-------------------|-------------|
| Sample representativeness                    | Nationally representative sample                           | Satisfactory      | 0           |
|                                              | Fraction of the target population                          | Insufficient      | 1           |
| Assessment of SES                            | Assigned based on most recent census                       | Satisfactory      | 0a          |
|                                              | Assigned through family or household member                | Satisfactory      | 0b          |
|                                              | Use of an own or 'other' category                          | Satisfactory      | 0c          |
|                                              | One or more pairwise comparisons are not reported          | Satisfactory      | 0d          |
|                                              | Exclusion of meaningful parts of the population            | Insufficient      | 1           |
| Definition of alcohol-attributable mortality | 100% alcohol-attributable mortality exclusively            | Satisfactory      | 0           |
|                                              | Inclusion of diseases of the liver and/or pancreatitis     | Insufficient      | 1a          |
|                                              | Inclusion of neoplasms in the upper gastrointestinal tract | Insufficient      | 1b          |
|                                              | Inclusion of all types of injuries                         | Insufficient      | 1c          |
|                                              | Inclusion of two or more of the above categories           | Flawed            | 2           |
| Data linkage                                 | Individual linkage                                         | Satisfactory      | 0           |
|                                              | No linkage                                                 | Insufficient      | 1           |
| Age adjustment                               | Age-adjusted                                               | Satisfactory      | 0           |
|                                              | Not age-adjusted                                           | Insufficient      | 1           |

SES socioeconomic status.

**Table S6** Quality checklist. Ratings on population representativeness of the sample, measurement of socioeconomic status (SES), operationalization of alcohol-attributable mortality, data linkage, and age-adjustment for each study included in the meta-analysis

| Study                              | Population representativeness of the sample | Measurement of SES | Operationalization of alcohol-attributable mortality | Data linkage | Age adjustment |
|------------------------------------|---------------------------------------------|--------------------|------------------------------------------------------|--------------|----------------|
| Valkonen, 1993 [48]                | 0                                           | 0a                 | 0                                                    | 0            | 0              |
| Mäkelä et al., 1997 [35]           | 0                                           | 0b                 | 0                                                    | 0            | 0              |
| Shkolnikov et al., 1998 [43]       | 0                                           | 0                  | 0                                                    | 1            | 0              |
| Valkonen et al., 2000 [47]         | 0                                           | 0a,b               | 0                                                    | 0            | 0              |
| Martikainen, 2001 [38]             | 0                                           | 0a                 | 0                                                    | 0            | 1              |
| Hemström, 2002 [30]                | 0                                           | 0a,c               | 0                                                    | 0            | 0              |
| Leinsalu et al., 2003 [34]         | 0                                           | 0                  | 0                                                    | 1            | 0              |
| Romeri et al., 2007 [42]           | 0                                           | 0                  | 0                                                    | 1            | 0              |
| Herttua et al., 2008 [32]          | 0                                           | 0a,b               | 0                                                    | 0            | 0              |
| Mackenbach et al., 2008 [10]       | 0                                           | 0                  | 0                                                    | 0            | 0              |
| Mäki et al., 2008 [36]             | 0                                           | 1                  | 1c                                                   | 0            | 0              |
| Mäki et al., 2009 [37]             | 0                                           | 1                  | 1c                                                   | 0            | 0              |
| Conolly et al., 2010 [28]          | 0                                           | 0                  | 1a                                                   | 0            | 0              |
| Faeh et al., 2010 [29]             | 0                                           | 0                  | 2                                                    | 0            | 1              |
| Pridemore et al., 2010 [41]        | 0                                           | 0                  | 0                                                    | 1            | 0              |
| Herttua et al., 2011 [33]          | 0                                           | 0a,b               | 0                                                    | 0            | 1              |
| Tjepkema et al., 2012 [46]         | 0                                           | 0                  | 0                                                    | 0            | 0              |
| Tjepkema et al., 2013 [45]         | 0                                           | 0                  | 0                                                    | 0            | 0              |
| Mackenbach et al., 2015 [11]       | 0                                           | 0d                 | 0                                                    | 0            | 0              |
| Tarkiainen et al., 2016 [44]       | 0                                           | 0b                 | 0                                                    | 0            | 0              |
| Christensen et al., 2017 [27]      | 0                                           | 0                  | 0                                                    | 0            | 1              |
| Herttua et al., 2017 [31]          | 0                                           | 0a,b               | 0                                                    | 0            | 1              |
| Mateo-Urdiales et al., 2020 [39]   | 0                                           | 0                  | 0                                                    | 0            | 0              |
| Pechholdová & Jasilionis 2020 [40] | 0                                           | 0                  | 0                                                    | 0            | 0              |
| Vierboom, 2020 [49]                | 0                                           | 0                  | 2                                                    | 1            | 0              |

0=Satisfactory, criterion is met (e.g., sample is representative; data were linked etc.)

0a=Classification via a previous census

0b=Classification via another family member

0c=Formation of a rest category

0d=One or more pairwise comparisons are not reported

1=Not satisfactory, criterion is not met

1a=Diseases of liver and/or pancreas are included

1b=Neoplasms of the upper gastrointestinal tract are included

1c=Injuries of all kind are included

1d=The age ranged spanned less than 10 years

2=More than one of the disease categories mentioned above are included

**Table S7** Results from random-effects meta-regression models predicting the relative risk (RR)

| Predictor <sup>†</sup> | RR      | 95% CI    | R <sup>2</sup> | AIC | ANOVA |
|------------------------|---------|-----------|----------------|-----|-------|
| <b>Model 1</b>         |         |           |                |     |       |
| Level of deprivation   | 3.33*** | 2.53-4.37 | 0.50           | 329 |       |
| <b>Model 2</b>         |         |           |                |     |       |
| Level of deprivation   | 3.34*** | 2.57-4.34 | 0.54           | 308 | ***   |
| Education              | 1.77*** | 1.38-2.29 |                |     |       |
| Income                 | 1.15    | 0.76-1.75 |                |     |       |
| <b>Model 3</b>         |         |           |                |     |       |
| Level of deprivation   | 3.31*** | 2.56-4.29 | 0.55           | 301 | **    |
| Education              | 1.87*** | 1.45-2.42 |                |     |       |
| Income                 | 1.23    | 0.81-1.86 |                |     |       |
| Male sex               | 1.16**  | 1.04-1.30 |                |     |       |

CI confidence interval; AIC Akaike information criterion.

\* p<0.1, \*\* p<0.05, \*\*\*p<0.001.

<sup>†</sup> Reference groups used were occupation for the indicator of socioeconomic status (SES), and women for sex.

Models were fit to the level of socioeconomic deprivation, scaled as a proportion between 0 and 1. The coefficients for the level of socioeconomic deprivation refer to the difference between the lowest level of socioeconomic deprivation (i.e., lowest percentile) and the highest level of socioeconomic deprivation (100<sup>th</sup> percentile).

*Note.* The level of socioeconomic deprivation, the indicator of SES used, and sex were introduced as covariates in three stepwise models. Fixed effects for the study ID were used to control for clustering of observations within studies.

**Table S8** Results from permutation tests to test the robustness of random-effects meta-regression models predicting the log relative risk (RR) conditional on the level of socioeconomic deprivation, the indicator of socioeconomic status (SES) used, and sex in three consecutive models, while controlling for clustering of estimates within studies

| Predictor <sup>†</sup> | RR   | p-value | 95% CI    |
|------------------------|------|---------|-----------|
| <b>Model 1</b>         |      |         |           |
| Level of deprivation   | 3.33 | 0.001   | 2.53-4.37 |
| <b>Model 2</b>         |      |         |           |
| Level of deprivation   | 3.34 | 0.001   | 2.57-4.34 |
| Education              | 1.77 | 0.001   | 1.38-2.29 |
| Income                 | 1.15 | 0.483   | 0.76-1.75 |
| <b>Model 3</b>         |      |         |           |
| Level of deprivation   | 3.31 | 0.001   | 2.56-4.29 |
| Education              | 1.87 | 0.001   | 1.45-2.42 |
| Income                 | 1.23 | 0.349   | 0.81-1.86 |
| Male sex               | 1.16 | 0.008   | 1.04-1.30 |

CI confidence interval.

† Reference groups used were occupation for the indicator of SES, and women for sex. The coefficients for the level of socioeconomic deprivation refer to the difference between the lowest level of deprivation (i.e., lowest percentile) and the highest level of socioeconomic deprivation (100<sup>th</sup> percentile).

*Note.* Fixed effects for the study ID were used to control for clustering of observations within studies.

**Table S9** Results from one-stage random-effects dose-response meta-analyses on the relative mortality risk for alcohol-attributable mortality conditional on the level of socioeconomic deprivation, stratified by sex and indicator of socioeconomic status (SES)

| Model (N)<br>Predictor | Women         |            |                |      | Men           |              |                |      |
|------------------------|---------------|------------|----------------|------|---------------|--------------|----------------|------|
|                        | RR            | 95% CI     | R <sup>2</sup> | AIC  | RR            | 95% CI       | R <sup>2</sup> | AIC  |
| <b>Education</b>       | <b>(N=71)</b> |            |                |      | <b>(N=76)</b> |              |                |      |
| <i>Model 1</i>         |               |            |                |      |               |              |                |      |
| Level of deprivation   | 5.16***       | 3.93-6.78  | 0.27           | 1481 | 7.28***       | 5.65-9.39    | 0.34           | 3358 |
| <i>Model 2</i>         |               |            |                |      |               |              |                |      |
| Level of deprivation   | 30.71***      | 9.96-94.67 | 0.27           | 125  | 50.71***      | 20.65-124.49 | 0.34           | 106  |
| Level of deprivation^2 | 0.15**        | 0.04-0.55  |                |      | 0.12***       | 0.05-0.33    |                |      |
| <b>Income</b>          | <b>(N=24)</b> |            |                |      | <b>(N=24)</b> |              |                |      |
| <i>Model 1</i>         |               |            |                |      |               |              |                |      |
| Level of deprivation   | 4.99***       | 2.76-9.02  | 0.92           | 190  | 5.72***       | 3.43-9.80    | 0.81           | 976  |
| <i>Model 2</i>         |               |            |                |      |               |              |                |      |
| Level of deprivation   | 0.60          | 0.14-2.64  | 0.93           | 47   | 1.67          | 0.27-10.39   | 0.81           | 506  |
| Level of deprivation^2 | 7.10**        | 2.06-24.51 |                |      | 3.03          | 0.50-18.41   |                |      |
| <b>Occupation</b>      | <b>(N=24)</b> |            |                |      | <b>(N=37)</b> |              |                |      |
| <i>Model 1</i>         |               |            |                |      |               |              |                |      |
| Level of deprivation   | 2.13***       | 1.44-3.16  | 0.30           | 242  | 4.16***       | 3.63-7.77    | 0.79           | 1367 |
| <i>Model 2</i>         |               |            |                |      |               |              |                |      |
| Level of deprivation   | 4.46***       | 2.38-8.35  | 0.32           | 225  | 4.32**        | 1.80-10.35   | 0.85           | 691  |
| Level of deprivation^2 | 0.49**        | 0.28-0.86  |                |      | 0.99          | 0.39-2.52    |                |      |

N number of risk estimates; CI confidence interval; AIC Akaike information criterion.

*Note.* Models were fit to the level of socioeconomic deprivation, scaled as a proportion between 0 and 1. The coefficients for the level of socioeconomic deprivation refer to the difference between the lowest level of socioeconomic deprivation (i.e., lowest percentile) and the highest level of socioeconomic deprivation (100<sup>th</sup> percentile).

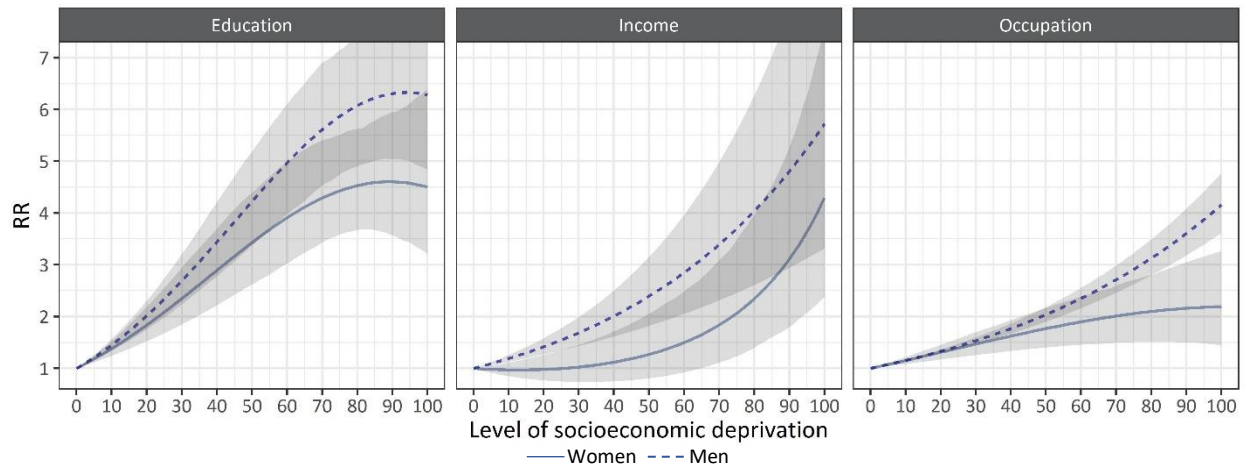

**Fig. S1** Dose-response relationship between the level of socioeconomic deprivation and the relative risk of mortality from an alcohol-attributable cause of death (RR) by indicator of socioeconomic status (SES) and sex.

*The level of socioeconomic deprivation indicates the percentile in the cumulative SES distribution with 0=lowest level of socioeconomic deprivation and 100=highest level of socioeconomic deprivation. Grey shaded areas show 95% uncertainty bands.*

**Table S10** Results from sensitivity analyses. Random-effects meta-regression models predicting the log relative risk (RR) conditional on the study quality (a least one criterion not fulfilled vs. all criteria fulfilled), the country where the study was conducted (Finland vs. any other country), and the income inequality in the country (Gini coefficient)

| Predictor <sup>†</sup>  | RR   | p-value | 95% CI    |
|-------------------------|------|---------|-----------|
| <b>Model 1</b>          |      |         |           |
| Study quality           | 0.93 | 0.747   | 0.62-1.41 |
| <b>Model 2</b>          |      |         |           |
| Finland (vs. all other) | 0.73 | 0.086   | 0.50-1.05 |
| <b>Model 3</b>          |      |         |           |
| Gini coefficient        | 1.01 | 0.086   | 0.98-1.04 |

All models adjust for the level of socioeconomic deprivation. Fixed effects for the study ID were used to control for clustering of observations within studies.

CI confidence interval.
